# Supplementary material
Source: MDPI journal article supplement (https://www.mdpi.com/2077-1312/12/4/612)
Supplement: s1 [file s1]

## Supplementary Material

**Table S1.** Sampling data of RRS *James Cook* cruise JC42 including names of the species, sample ID, sample depths [m] and coordinates, used gears and fixation types.

| Species                           | Sample ID | Site      | Area | Depth [m] | Start Longitude | Start Latitude | Date     | Gear | Fixation     |
|-----------------------------------|-----------|-----------|------|-----------|-----------------|----------------|----------|------|--------------|
| <i>Cladorhiza elsaae</i>          | SMF-12210 | JC42-3-17 | E2   | 2641      | -56.08963333°   | -30.31775°     | 24.01.10 | ROV  | Ethanol      |
| <i>Cladorhiza elsaae</i>          | SMF-12211 | JC42-3-17 | E2   | 2641      | -56.08963333°   | -30.31775°     | 24.01.10 | ROV  | Formaldehyde |
| <i>Cladorhiza elsaae</i>          | SMF-12212 | JC42-3-15 | E2   | 2642      | -56.08936667°   | -30.3172167°   | 23.01.10 | ROV  | Ethanol      |
| <i>Abyssocladia truespacemeri</i> | SMF-12213 | JC42-4-15 | E9   | 2402      | -60.04303333°   | -29.98125°     | 04.02.10 | ROV  | Ethanol      |
| <i>Abyssocladia hendrixii</i>     | SMF-12214 | JC42-4-7  | E9   | 2402      | -60.04281667°   | -29.9822667°   | 30.01.10 | ROV  | Ethanol      |
| <i>Abyssocladia hendrixii</i>     | SMF-12215 | JC42-4-15 | E9   | 2402      | -60.04303333°   | -29.98125°     | 04.02.10 | ROV  | Formaldehyde |

**Table S2.** *Abyssocladia truespacemeni* and sizes of its different types of spicules compared to other species of *Abyssocladia* with a similar shape. Minimum-mean-and numbers of measured spicules are shown (in brackets). For some of the species used for comparison only the size ranges of different spicules are given. If no values are given, the type of spicule is absent.

| Specimen                    | Holotype                           | <i>Abyssocladia polycephalus</i>    | <i>Abyssocladia natushimae</i> | <i>Abyssocladia inflata</i> | <i>Abyssocladia carcharias</i> | <i>Abyssocladia lakwollii</i> |
|-----------------------------|------------------------------------|-------------------------------------|--------------------------------|-----------------------------|--------------------------------|-------------------------------|
|                             | SMF-12213                          | Hestetun, Pomponi & Rapp, 2016 [19] | Ise & Vaelet, 2010 [39]        | Vacelet, 2006 [41]          | Kelly & Vacelet, 2011 [36]     | Kelly & Vacelet, 2014 [42]    |
| <b>Mycalostyles</b>         |                                    |                                     |                                |                             |                                |                               |
| length [μm]                 | 750.0-1328.3-1600.0 (30)           | 720.0-933.0-1070                    | 1350.0-1647.0-1940.0           | 1075.0-1800.0               | 510.0-1070.0                   | 750.0-1800.0                  |
| diameter max. [μm]          | 7.5-20.8-27.5 (30)                 | 14.0-17.0-22.0                      | 19.0-24.0-26.5                 | 21.0-33.0                   | 8.0-19.0                       | 15-31                         |
| <b>Arcuate isochelae I</b>  |                                    |                                     |                                |                             |                                |                               |
| length [μm]                 | 60.0- <del>87.8</del> -113.8 (30)  | 28.0- <del>43.0</del> -50.0         |                                | 140.0-150.0                 | 60.0-86.0                      | 27.0-36.0                     |
| shaft diameter [μm]         | 5.0- <del>7.7</del> -10.0 (30)     |                                     |                                | 25.0-50.0                   |                                |                               |
| End diameter [μm]           | 25.0- <del>32.5</del> -42.5 (30)   |                                     |                                |                             |                                |                               |
| Front alae length [μm]      | 21.3- <del>33.1</del> -42.0 (30)   |                                     |                                |                             |                                |                               |
| Front alae diameter [μm]    | 11.3- <del>15.8</del> -29.0 (30)   |                                     |                                |                             |                                |                               |
| <b>Arcuate isochelae II</b> |                                    |                                     |                                |                             |                                |                               |
| length [μm]                 | 27.5- <del>32.4</del> -40.0 (30)   |                                     |                                |                             | 35.0-48.0                      |                               |
| shaft diameter [μm]         | 1.0- <del>1.6</del> -2.5 (30)      |                                     |                                |                             |                                |                               |
| <b>Oxeas</b>                |                                    |                                     |                                |                             |                                |                               |
| length [μm]                 | 65.0- <del>109.0</del> -172.5 (30) |                                     |                                | 130.0-350.0                 |                                |                               |
| diameter max. [μm]          | 2.5- <del>4.1</del> -5.0 (30)      |                                     |                                | 3.0-5.0                     |                                |                               |
| <b>Sigmancistras I</b>      |                                    |                                     |                                |                             |                                |                               |
| length [μm]                 | 17.0-19.8-22.0 (30)                | 9.4-9.8-11.0                        | 9.0-10.7-12.0                  | 15.0-18.0                   | 8.0-12.0                       | 15.0-20.0                     |
| diameter [μm]               | 1.2-1.8-2.0 (30)                   |                                     |                                |                             |                                |                               |
| <b>Sigmancistras II</b>     |                                    |                                     |                                |                             |                                |                               |
| length [μm]                 | 27.0- <del>29.2</del> -32.0 (30)   |                                     | 20.0- <del>22.0</del> -23.0    |                             | 15.0-16.2                      |                               |
| diameter [μm]               | 1.7-2.0-3.0 (30)                   |                                     |                                |                             | 1.9-2.0                        |                               |

**Table S3.** Spicule sizes of the holotype and the paratype of *Abyssocladia hendrixii*. Minimum-mean-and numbers of measured spicules are shown (in brackets). Comparison to spicule sizes of *A.dominalba* and *A. bruuni*, size ranges are given. If no values are given, the type of spicule is absent.

| Specimen                                              | Holotype                                 | Paratype                                 | <i>Abyssocladia dominalba</i> | <i>Abyssocladia bruuni</i> |
|-------------------------------------------------------|------------------------------------------|------------------------------------------|-------------------------------|----------------------------|
|                                                       | SMF-12214                                | SMF-12215                                | Vacelet, 2006 [41]            | Lévi, 1964 [3]             |
| <b>Mycalostyles</b>                                   |                                          |                                          |                               |                            |
| length [µm]                                           | 700.0- <del>1334.5</del> -1600,0<br>(30) | 750.0- <del>1447.9</del> -2005.0<br>(30) | 620.0-2500.0                  | 1300.0-1650.0              |
| diameter max. [µm]                                    | 12.5- <del>23.0</del> -30.0 (30)         | 15.0- <del>24.2</del> -40.0 (30)         | 7.0-35.0                      | 25.0-28.0                  |
| <b>Arcuate isochelae</b>                              |                                          |                                          |                               |                            |
| length [µm]                                           | 62.5- <del>81.4</del> -91.25 (30)        | 52.5- <del>76.8</del> -97.5 (30)         | 80,0-170.0                    | 70.0-75.0                  |
| shaft diameter [µm]                                   | 5.5- <del>7.5</del> -9.5 (30)            | 7.0- <del>10.0</del> -5.0 (30)           | 8.0                           |                            |
| End diameter [µm]                                     | 25.0- <del>32.3</del> -37.5 (30)         | 20.0- <del>28.3</del> -35.5 (30)         |                               |                            |
| Front alae length<br>[µm] Front alae<br>diameter [µm] | 26.3- <del>31.9</del> -38.0 (30)         | 17.5- <del>29.4</del> -35.0 (30)         |                               |                            |
|                                                       | 12.0- <del>15.7</del> -20.0 (30)         | 10.0- <del>13.7</del> -20.0 (30)         |                               |                            |
| <b>Sigmancistras I</b>                                |                                          |                                          |                               |                            |
| length [µm]                                           | 19.0- <del>21.4</del> -24.0 (30)         | 17.5- <del>19.4</del> -22.5 (30)         | 9.0-12,5                      |                            |
| diameter [µm]                                         | 1.9- <del>1.3</del> -2.7 (30)            | 1.4- <del>1.9</del> -2.5 (30)            |                               |                            |
| <b>Sigmancistras II</b>                               |                                          |                                          |                               |                            |
| length [µm]                                           | 22.0-30.8-34.5 (30)                      | 22.5-26.9-30.0 (30)                      | 30.0-40.0                     | 29.0-30.0                  |
| diameter [µm]                                         | 2.0-2.7-4.0 (30)                         | 1.8-2.2-2.75 (30)                        |                               |                            |

**Table S4.** Spicule sizes of *Cladorhiza elsaae*. Minimum-mean-and numbers of measured spicules are shown (in brackets). For comparison, measured spicules of *Cladorhiza abyssicola* and *Cladorhiza gelida* are also shown.

| Specimen                      | Holotype                            | Paratype 1                           | Paratype 2                           | <i>Cladorhiza abyssicola</i> Sars, 1872 [2] | <i>Cladorhiza gelida</i> Lundbeck, 1905 [46] |
|-------------------------------|-------------------------------------|--------------------------------------|--------------------------------------|---------------------------------------------|----------------------------------------------|
|                               | SMF-12210                           | SMF-12211                            | SMF-12212                            | Hestetun et al. 2017 [48]                   | Hestetun et al. 2017 [48]                    |
| <b>Mycalostyles I</b>         |                                     |                                      |                                      |                                             |                                              |
| length [μm]                   | 520.0- <del>751.7</del> -950.0 (30) | 450.0- <del>762.2</del> -1001.0 (30) | 420.0- <del>740.6</del> -1000.0 (30) | 310.0- <del>549.0</del> -930.0              | 380.0- <del>622.0</del> -1000.0              |
| diameter max. [μm]            | 10.0- <del>19.5</del> -30.5 (30)    | 9.0- <del>17.8</del> -28.0 (30)      | 9.0- <del>16.8</del> -24.0 (30)      | 5.2- <del>13.6</del> -25.1                  | 7.0- <del>16.6</del> -25.1                   |
| <b>Mycalostyles II</b>        |                                     |                                      |                                      |                                             |                                              |
| length [μm]                   | 275.0- <del>583.3</del> -700.0 (30) | 370.0- <del>689.0</del> -940 (30)    | 410.0- <del>657.0</del> -830.0 (30)  |                                             |                                              |
| diameter max. [μm]            | 1.2- <del>5.2</del> -9.0 (30)       | 1.0- <del>5.0</del> -9.0 (30)        | 2.0- <del>5.2</del> -9.0 (30)        |                                             |                                              |
| <b>Anisochelae</b>            |                                     |                                      |                                      |                                             |                                              |
| length [μm]                   | 31.0- <del>34.1</del> -37.0 (30)    | 31.3- <del>36.0</del> -40.0 (30)     | 32.0- <del>34.4</del> -37.0 (30)     | 18.2- <del>22.2</del> -28.6                 | 22.8- <del>31.2</del> -42.3                  |
| shaft diameter [μm] upper end | 2.3- <del>3.2</del> -4.0 (30)       | 2.5- <del>3.1</del> -4.0 (30)        | 2.8- <del>3.3</del> -5.0 (30)        |                                             |                                              |
| diameter [μm]                 | 9.0- <del>10.7</del> -14.0 (30)     | 10.0- <del>11.5</del> -15.0 (30)     | 10.0- <del>12.1</del> -14.0 (30)     |                                             |                                              |
| lower end diameter [μm]       | 3.0- <del>4.2</del> -5.0 (30)       | 3.0- <del>5.1</del> -6.5 (30)        | 3.0- <del>4.6</del> -6.0 (30)        |                                             |                                              |
| <b>Sigmas</b>                 |                                     |                                      |                                      |                                             |                                              |
| length [μm]                   | 140.0- <del>148.7</del> -160.0 (30) | 110.0- <del>154.4</del> -179.0 (30)  | 140.0- <del>153.9</del> -180.0 (30)  | 65.0- <del>92.3</del> -127.4                | 86.0- <del>139</del> - 174.0                 |
| diameter [μm]                 | 5.0- <del>9.2</del> -12.5 (30)      | 6.0- <del>9.0</del> -11.0 (30)       | 7.3- <del>8.9</del> -10.0 (30)       |                                             |                                              |
| <b>Sigmancistras I</b>        |                                     |                                      |                                      |                                             |                                              |
| length [μm]                   | 49.0- <del>58.5</del> -72.5 (30)    | 50.0- <del>63.0</del> -73.0 (30)     | 51.0- <del>61.5</del> -85.0 (30)     | 34.5- <del>40.5</del> -52.8                 | 37.7- <del>52.3</del> -85.8                  |
| diameter [μm]                 | 1.5- <del>2.4</del> -3.9 (30)       | 1.9- <del>2.4</del> -3.0 (30)        | 2.0- <del>2.6</del> -4.0 (30)        |                                             |                                              |
| <b>Sigmancistras II</b>       |                                     |                                      |                                      |                                             |                                              |
| length [μm]                   | 50.0- <del>55.2</del> -67.0 (30)    | 45.0- <del>52.6</del> -61.0 (30)     | 47.5- <del>54.2</del> -60.0 (30)     |                                             |                                              |
| diameter [μm]                 | 2.9- <del>3.5</del> -4.2 (30)       | 2.8- <del>3.5</del> -4.8 (30)        | 3.0- <del>3.7</del> -5.0 (30)        |                                             |                                              |
